# Supplementary material for: Icebreaker-inspired Janus nanomotors to combat barriers in the delivery of chemotherapeutic agents
Source: Royal Society of Chemistry journal article supplement (doi:10.1039/d0nr08853f), 2021-01-01
Supplement: d0nr08853f1.pdf [file d0nr08853f1.pdf]

## Supplementary Information

### Icebreaker-inspired Janus nanomotors to combat barriers in the delivery of chemotherapeutic agents

Zhanlin Zhang,<sup>a,b,#</sup> Dandan Zhang,<sup>a,#</sup> Bo Qiu,<sup>b</sup> Wenxiong Cao,<sup>b</sup> Yuan Liu,<sup>b</sup> Qingjie Liu<sup>b</sup> and Xiaohong Li<sup>a,b,\*</sup>

<sup>a</sup> *School of Life Science and Engineering, Key Laboratory of Advanced Technologies of Materials, Ministry of Education, Southwest Jiaotong University, Chengdu 610031, P.R. China.*

<sup>b</sup> *School of Materials Science and Engineering, Southwest Jiaotong University, Chengdu 610031, P.R. China.*

<sup>#</sup> These authors contributed equally to this work.

\* Corresponding Author. E-mail: xhli@swjtu.edu.cn. Tel: +8628-87634068, Fax: +8628-87634649.

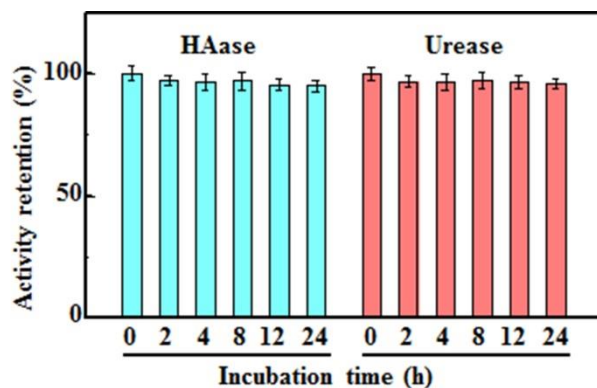

**Fig. S1.** Catalytic activities of HAase and urease on JMs after incubation for 24 h in the media containing 50% of FBS ( $n = 3$ ).

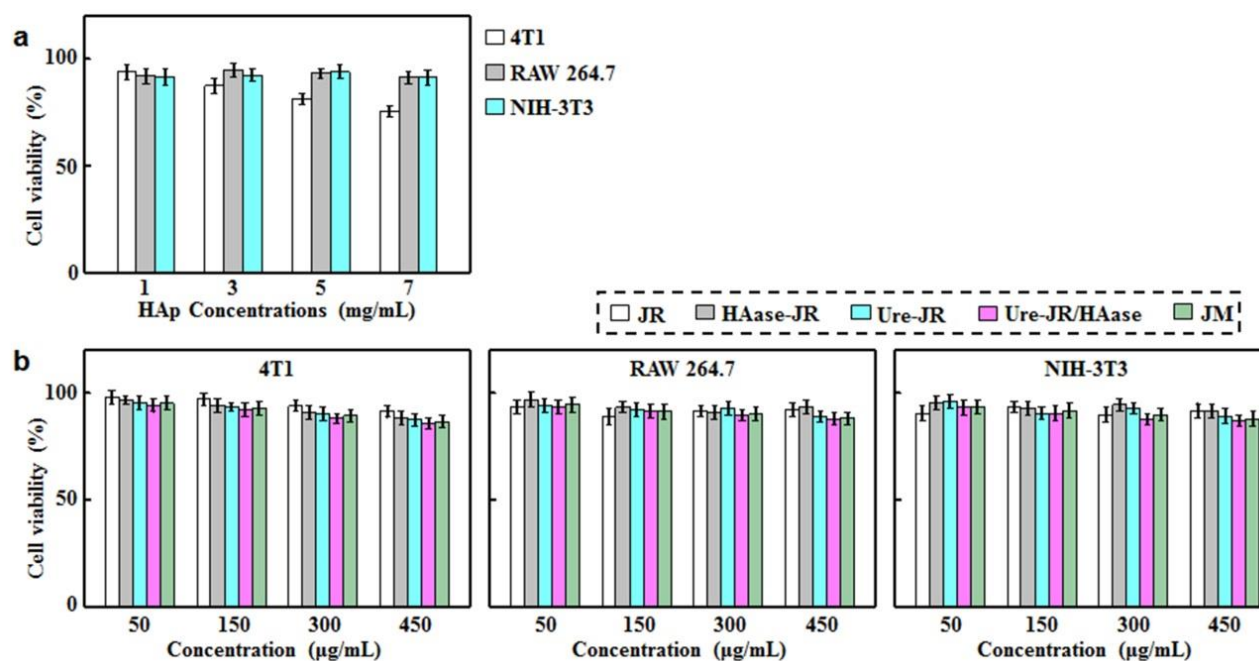

**Fig. S2.** (a) Viability of 4T1, RAW 264.7, and NIH-3T3 cells after incubation with empty HAp nanorods of different concentrations ( $n = 5$ ). (b) Viability of 4T1, RAW 264.7, and NIH-3T3 cells after incubation with empty JRs, HAase-JRs, Ure-JRs, Ure-JRs/HAase, and JMs of different concentrations ( $n = 5$ ).

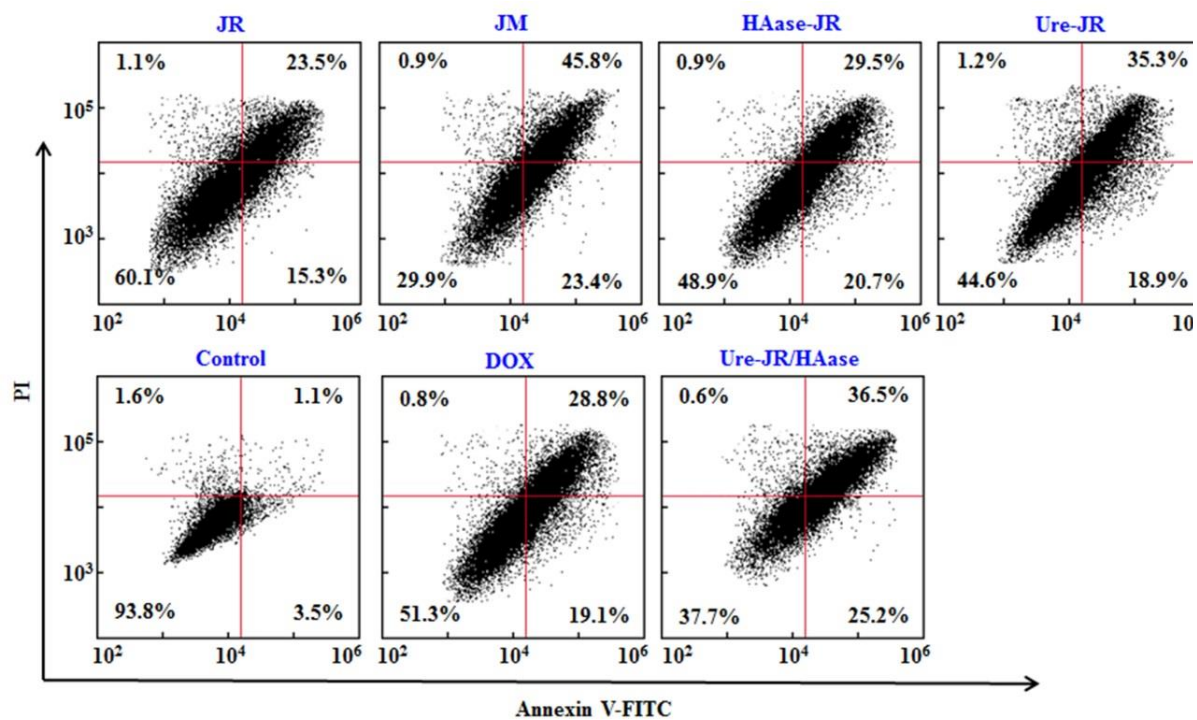

**Fig. S3.** Apoptosis analysis of 4T1 cells after treatment with free DOX, JRs, HAase-JRs, Ure-JRs, JMs, and Ure-JR/HAase in media containing urea and HA, using PBS treatment as control (Inserted numbers indicate the percentage of cells present in each area).

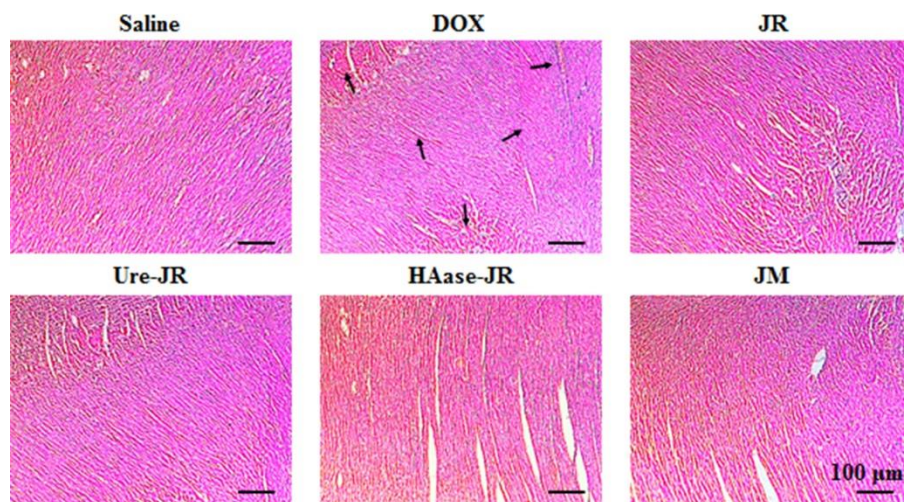

**Fig. S4.** H&E staining images of heart tissues retrieved on day 21 after treatment with JRs, Ure-JRs, HAase-JRs, and JMs, using free DOX and PBS treatment as control. Arrows indicate the presence of inflammatory cells.

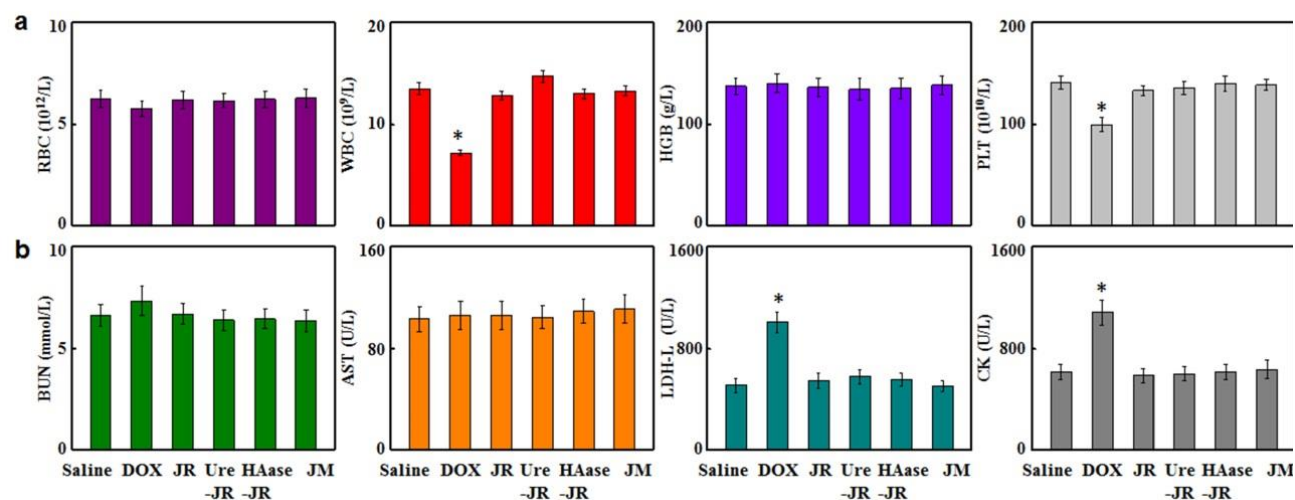

**Fig. S5.** Hematological analysis of blood (RBC, WBC, HGB, and PLT counts) and (b) biochemical analysis of serum (BUN, AST , LDH-L, and CK levels) after treatment for 24 h with JRs, Ure-JRs, HAase-JRs, and JMs, using free DOX and PBS treatment as control ( $n = 6$ , \*:  $p < 0.05$  vs other groups).
